# Supplementary material for: Rice OsANN9 Enhances Drought Tolerance through Modulating ROS Scavenging Systems
Source: MDPI journal article supplement (doi:10.3390/ijms242417495), 2023-12-15
Supplement: s1 [file s1]

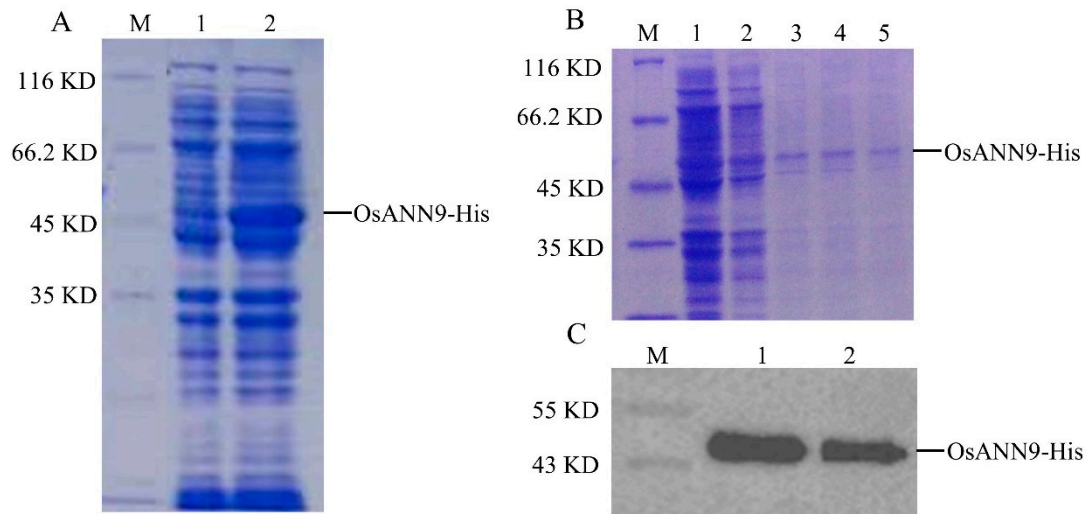

**Figure S1** Purification of OsANN9-His protein. (A and B) Induction and purification of OsANN9-His protein. pET30a-OsANN9 was introduced into *E. coli* BL21 strain (lane 1 in A) and induced with 0.5 mM IPTG at 18°C for 6 h (lane 2 in A). OsANN9-His protein purification was performed with 0.5 mL elution buffer containing 250 mM imidazole (lane 2 in B) and 500 mM imidazole (lane 3-5 in B). (C) Western blot analysis of OsANN9-His protein. M: protein molecular weight marker.

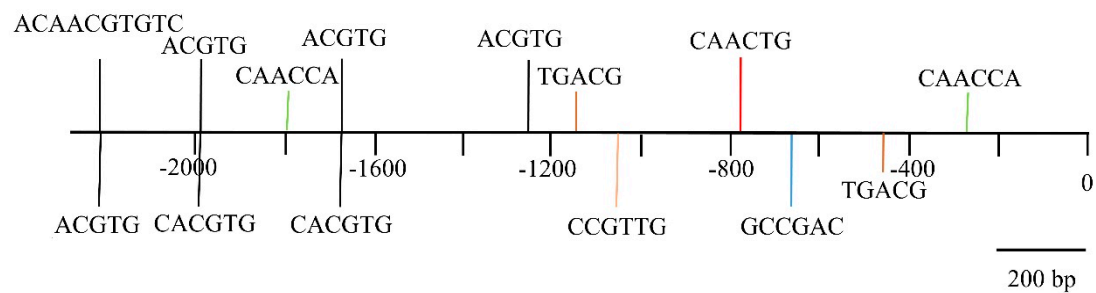

**Figure S2** Prediction of stress-related cis-acting elements in the promoter sequence of *OsANN9*. Six CRE types, including ABRE (black line), DRE (blue line), MBS (red line), MYB-recognition site (yellow line), MYB (green line) and TGACG-motif (brown line) were universally distributed in the *OsANN9* promoter regions and are shown with different colored lines.

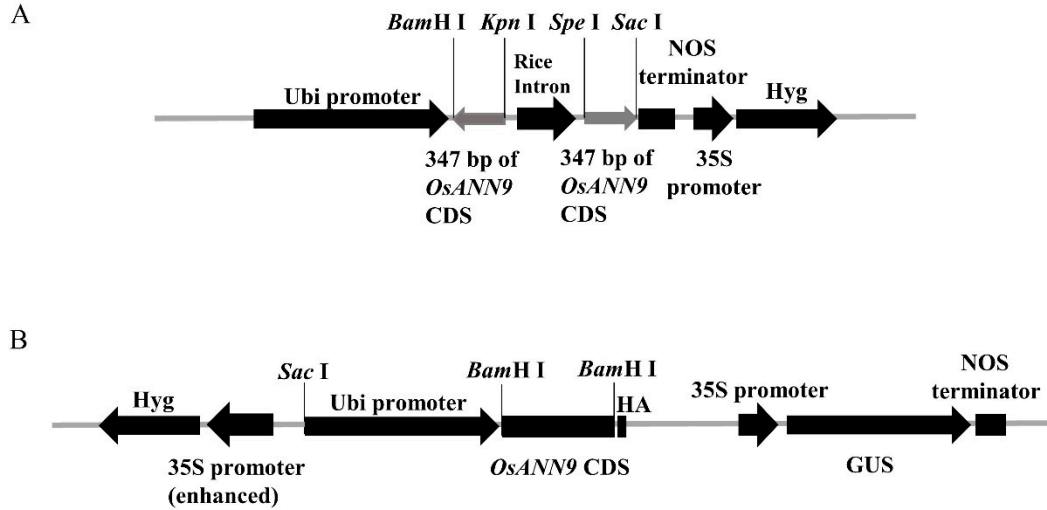

**Figure S3** Schematic diagram of expression vectors. (A) Schematic diagram of the specific CDS fragment of *OsANN9* in the pTCK303-*OsANN9*-RNAi vector. (B) Schematic diagram of the CDS of *OsANN9* in the pCAMBIA1301-Ubi::HA expression vector.

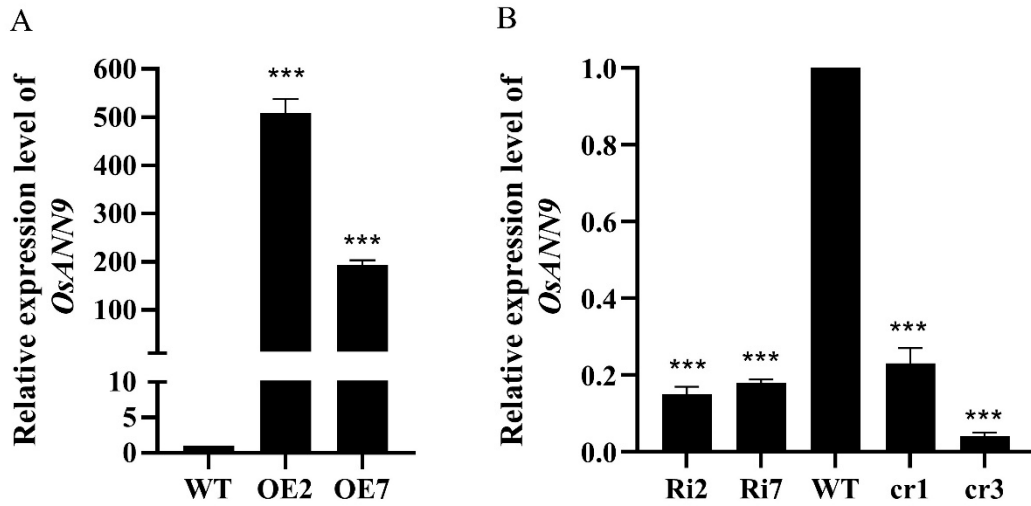

**Figure S4** Transcript levels of *OsANN9* in WT, *OsANN9*-OE, *OsANN9*-Ri and *osann9* plants. (A and B). The RT-qPCR results of *OsANN9* expression level in the WT, *OsANN9*-OE (OE2, OE7), *OsANN9*-Ri (Ri2, Ri7) and *osann9* (cr1, cr3) plants. The expression level in WT was set to 1. Values were means  $\pm$  SD of three replicates. \* $P < 0.05$ , \*\* $P < 0.01$ , \*\*\* $P < 0.001$ . Student's *t*-test.

**Table S1** Primer sequences used in plasmids construction and PCR

| Primers | Sequence                                        | Purpose                |
|---------|-------------------------------------------------|------------------------|
| P1      | 5' TTCTGCAGCGGGATCCATGTGTTGCTGGTGCTGCTG 3'      | <i>OsANN9</i> cDNA     |
| P2      | 5' CGTAACGCGTGGATCCTTGGTACCCTTCTCAGGGCCGACGA 3' | amplification          |
| P3      | 5' GGTACCACTAGTGGGTAGAGCCCAGAGCATTG 3'          | <i>OsANN9</i> RNAi     |
| P4      | 5' GGATCCGAGCTCGATCAGCGCATTCTCGTCC 3'           | fragment amplification |

|     |                                  |                        |
|-----|----------------------------------|------------------------|
| P5  | 5' GCCGAGGGTAGAGCCCAGAGCAT 3'    | CRISPR-sgRNA1-         |
| P6  | 5' AAACATGCTCTGGGCTCTACCCT 3'    | <i>OsANN9</i>          |
| P7  | 5' GTTGATGCGCTGATCGAGATCCT 3'    | CRISPR-sgRNA2-         |
| P8  | 5' AACAGGATCTCGATCAGCGCAT 3'     | <i>OsANN9</i>          |
| P9  | 5' CTGCAGAACTCAGATGGGCTACAGAA 3' | <i>OsANN9</i> promoter |
| P10 | 5' ACTAGTGGCACACACGCCTCCTACGC 3' | amplification          |
| P11 | 5' CATCTCTCAGCACATTCCAGCAG 3'    | RT-qPCR                |
| P12 | 5' AGGAGGACGGCGATAACAGC 3'       | ( <i>ACTIN1</i> )      |
| P13 | 5' CTCCATTTCTCCCCCATCTCT 3'      | RT-qPCR                |
| P14 | 5' TTCTCGTCCGTTCCCCATCCTT 3'     | ( <i>OsANN9</i> )      |
| P15 | 5' TAAGGGCACTATCCACTTTGTCC 3'    | RT-qPCR                |
| P16 | 5' ACCAGCATGGCGGGTCTCA 3'        | ( <i>OsSODcc2</i> )    |
| P17 | 5' ACCGCCTCGGACCAAACACTAC 3'     | RT-qPCR                |
| P18 | 5' GGCAATCACCACCTTCTCGC 3'       | ( <i>OsCAT</i> )       |
| P19 | 5' CCTTCTCAGCTGCCAAGTG 3'        | RT-qPCR                |
| P20 | 5' ATCGGCATTAATCTTTIGCGG 3'      | ( <i>OsAPX2</i> )      |
